# Supplementary material
Source: publisher figshare collection journal article supplement (https://frontiersin.figshare.com/ndownloader/files/12431501)
Supplement: Supplementary file [file 12431501]

## **Supplementary Materials**

### **Defining nutrient combinations for optimal growth and polyhydroxybutyrate production by *Methylosinus trichosporium* OB3b using Response Surface Methodology**

Jorge A. Zaldívar Carrillo<sup>1</sup>, Lisa Y. Stein<sup>2</sup>, Dominic Sauvageau<sup>1#</sup>

<sup>1</sup> Department of Chemical and Materials Engineering, University of Alberta, Edmonton, AB, T6G 1H9, Canada

<sup>2</sup> Department of Biological Sciences, University of Alberta, Edmonton, AB, T6G 2V2, Canada

<sup>#</sup>Corresponding author:

Email: dominic.sauvageau@ualberta.ca

Phone: +1 780 492 8092

Fax: +1 780 492 2881

# **Effect of carbon and nitrogen source and inoculum history on growth of *M. trichosporium* OB3b – Growth Curves**

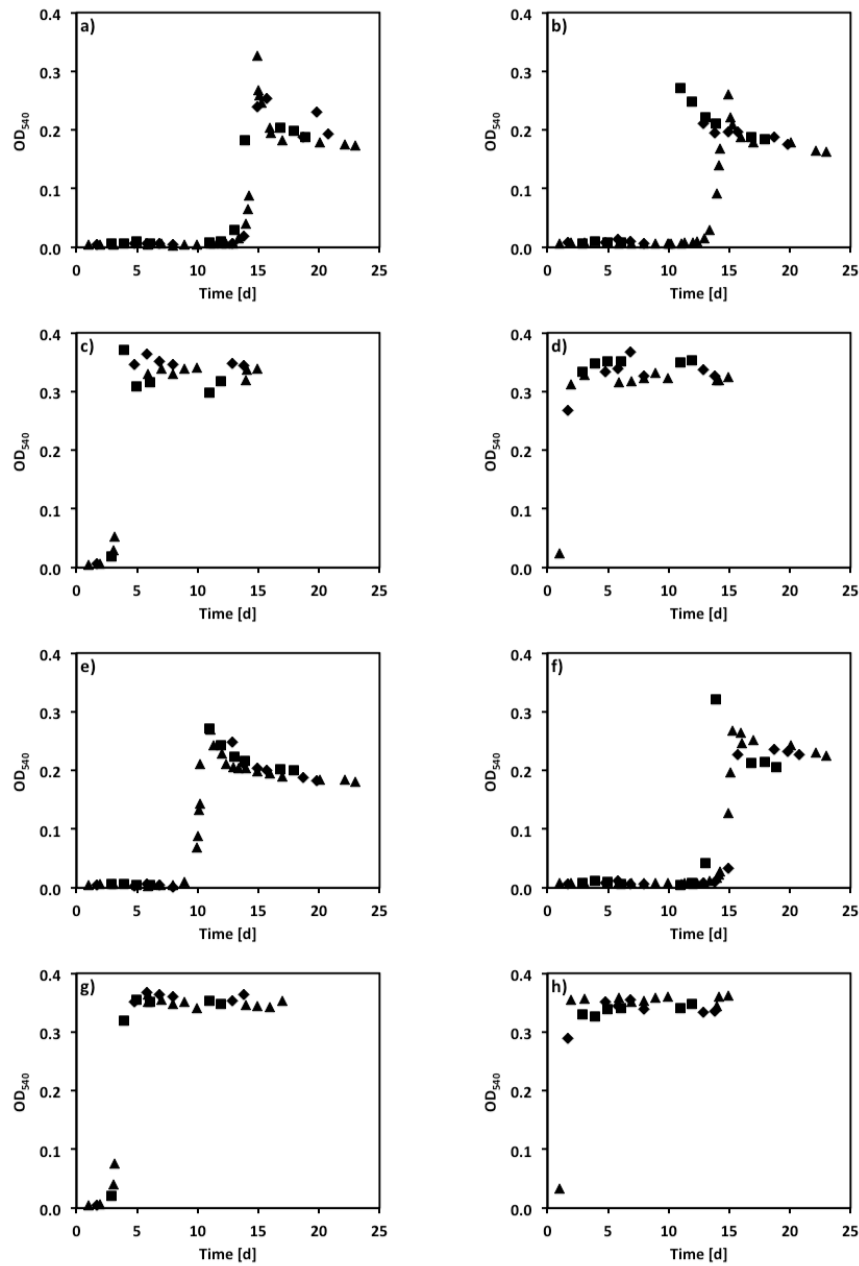

**Fig. S1.** Growth curves of *M. trichosporium* OB3b for treatments (methane-grown inocula, ammonium as nitrogen source) detailed in Table 1 for the second-order statistical regression analysis. Conditions: a) methanol, high N:C, aged inoculum; b) methanol, high N:C, fresh inoculum; c) methane, high N:C, aged inoculum; d) methane, high N:C, fresh inoculum; e) methanol, low N:C, aged inoculum; f) methanol, low N:C, fresh inoculum; g) methane, low N:C, aged inoculum; h) methane, low N:C, fresh inoculum.

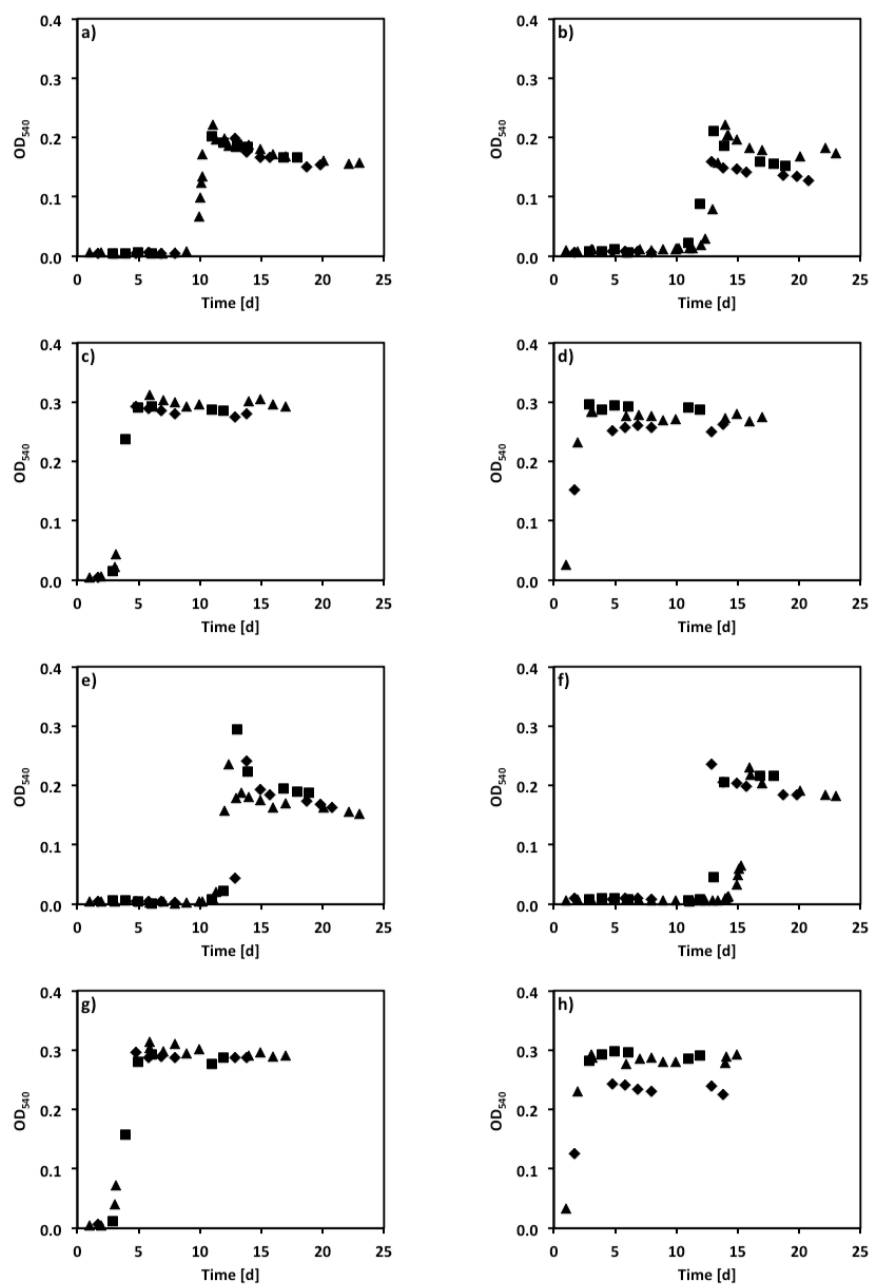

**Fig. S2.** Growth curves of *M. trichosporium* OB3b for treatments (methane-grown inocula, nitrate as nitrogen source) detailed in Table 1 for the second-order statistical regression analysis. Conditions: a) methanol, high N:C, aged inoculum; b) methanol, high N:C, fresh inoculum; c) methane, high N:C, aged inoculum; d) methane, high N:C, fresh inoculum; e) methanol, low N:C, aged inoculum; f) methanol, low N:C, fresh inoculum; g) methane, low N:C, aged inoculum; h) methane, low N:C, fresh inoculum.

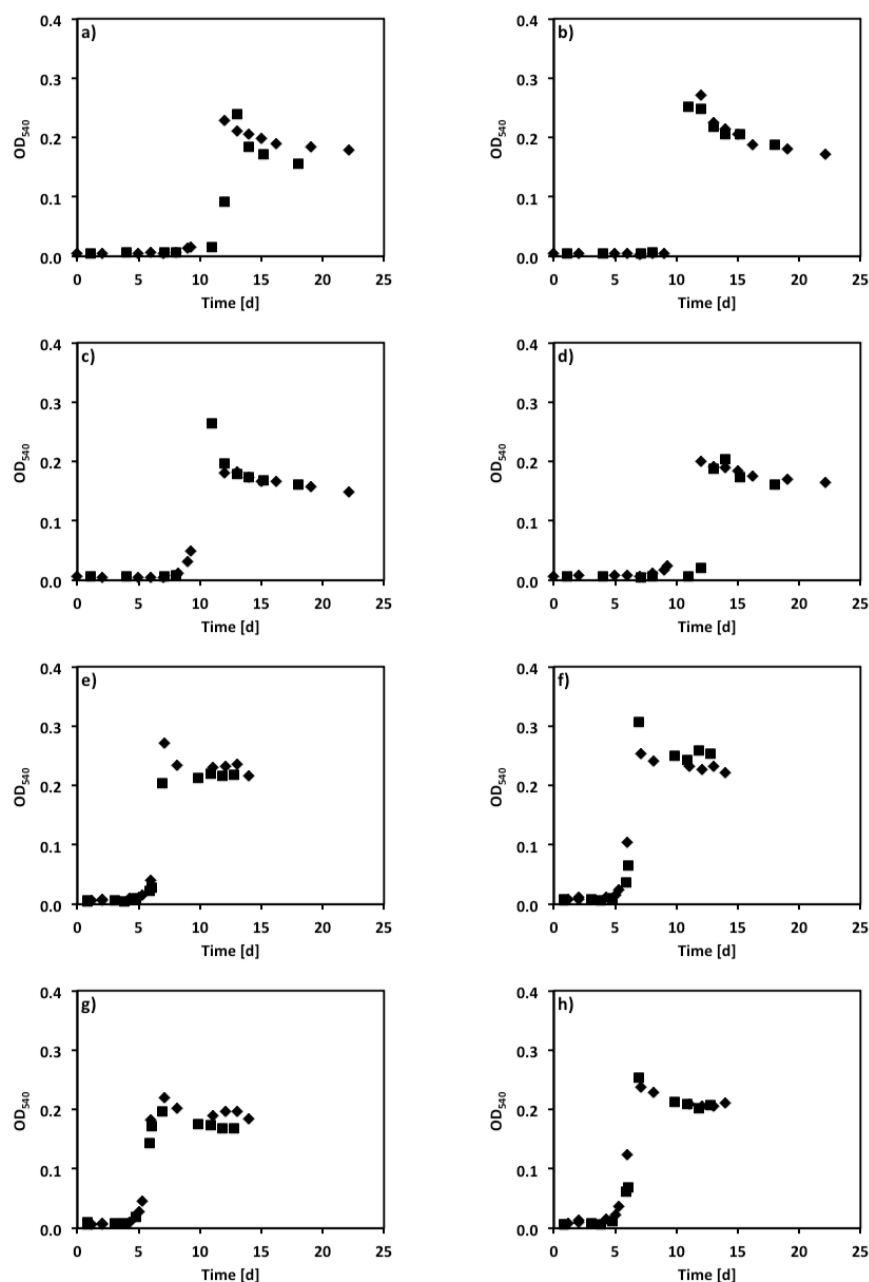

**Fig. S3.** Growth curves of *M. trichosporium* OB3b for treatments (methanol-grown inocula) detailed in Table 1 for the second-order statistical regression analysis. Conditions: a) methanol, ammonium, high N:C, aged inoculum; b) methanol, ammonium, low N:C, aged inoculum; c) methanol, nitrate, high N:C, aged inoculum; d) methanol, nitrate, low N:C, aged inoculum; e) methanol, ammonium, high N:C, fresh inoculum; f) methanol, ammonium, low N:C, fresh inoculum; g) methanol, nitrate, high N:C, fresh inoculum; h) methanol, nitrate, low N:C, fresh inoculum.

**Effect carbon and nitrogen source and inoculum history on growth of *M. trichosporium* OB3b – Analysis of Variance**

**Table S1:** Analysis of variance for factor effects on growth experiments. The response factor is OD<sub>540</sub>, as a measure of biomass concentration. Significant effects are highlighted in bold red.

| Source                                 | Sum of squares <sup>(1)</sup> | Degrees of freedom | Mean Square    | F             | p-value                      |
|----------------------------------------|-------------------------------|--------------------|----------------|---------------|------------------------------|
| <b>C-source</b>                        | <b>0.22822</b>                | <b>1</b>           | <b>0.22822</b> | <b>950.07</b> | <b>9.66×10<sup>-34</sup></b> |
| <b>N-source</b>                        | <b>0.02794</b>                | <b>1</b>           | <b>0.02794</b> | <b>116.30</b> | <b>1.55×10<sup>-14</sup></b> |
| <b>N:C ratio</b>                       | <b>0.00299</b>                | <b>1</b>           | <b>0.00299</b> | <b>12.44</b>  | <b>9.23×10<sup>-4</sup></b>  |
| Inoculum                               | 0.00052                       | 1                  | 0.00052        | 2.15          | 1.49×10 <sup>-1</sup>        |
| <b>C-source • N-source</b>             | <b>0.00423</b>                | <b>1</b>           | <b>0.00423</b> | <b>17.60</b>  | <b>1.14×10<sup>-4</sup></b>  |
| C-source • N:C ratio                   | 0.00076                       | 1                  | 0.00076        | 3.17          | 8.13×10 <sup>-2</sup>        |
| <b>C-source • Inoculum</b>             | <b>0.00380</b>                | <b>1</b>           | <b>0.00380</b> | <b>15.82</b>  | <b>2.29×10<sup>-4</sup></b>  |
| N-source • N:C ratio                   | 0.00019                       | 1                  | 0.00019        | 0.80          | 3.75×10 <sup>-1</sup>        |
| N-source • Inoculum                    | 0.00063                       | 1                  | 0.00063        | 2.64          | 1.11×10 <sup>-1</sup>        |
| N:C ratio • Inoculum                   | 0.00025                       | 1                  | 0.00025        | 1.06          | 3.09×10 <sup>-1</sup>        |
| C-source • N-source • N:C ratio        | 0.00047                       | 1                  | 0.00047        | 1.96          | 1.68×10 <sup>-1</sup>        |
| C-source • N-source • Inoculum         | 0.00006                       | 1                  | 0.00006        | 0.23          | 6.30×10 <sup>-1</sup>        |
| <b>C-source • N:C ratio • Inoculum</b> | <b>0.00103</b>                | <b>1</b>           | <b>0.00103</b> | <b>4.29</b>   | <b>4.37×10<sup>-2</sup></b>  |
| N-source • N:C ratio • Inoculum        | 0.00001                       | 1                  | 0.00001        | 0.02          | 8.80×10 <sup>-1</sup>        |
| Error                                  | 0.01177                       | 49                 | 0.00024        |               |                              |
| Total                                  | 0.28149                       | 63                 |                |               |                              |

<sup>(1)</sup> Constrained (Type III) sums of squares.

Based on the results obtained in Table S1, the resulting model for biomass produced ( $\hat{y}$ ), as measured by OD<sub>540</sub>, as a function of the parameters investigated is:

$$\hat{y} = \alpha_1 x_1 + \alpha_2 x_2 + \alpha_3 x_3 + \alpha_{12} x_1 x_2 + \alpha_{14} x_1 x_4 + \alpha_{134} x_1 x_3 x_4 \quad (\text{S1})$$

In the equation,  $x_i$  represents the factors investigated (1: C-source, 2: N-source, 3: N:C ratio, 4: inoculum history),  $\alpha_i$  represents the corresponding coefficients, and  $\alpha_{ij}$  and  $\alpha_{ijk}$  represent the coefficients for interactions.

**Table S2:** Analysis of variance for factor effects on growth experiments. The response factor is normalized OD<sub>540</sub> per mol of carbon substrate, as a measure of biomass yield. Significant effects are highlighted in bold red.

| Source                                 | Sum of squares <sup>(1)</sup> | Degrees of freedom | Mean Square    | F             | p-value                      |
|----------------------------------------|-------------------------------|--------------------|----------------|---------------|------------------------------|
| <b>C-source</b>                        | <b>0.03217</b>                | <b>1</b>           | <b>0.03217</b> | <b>182.07</b> | <b>4.00×10<sup>-18</sup></b> |
| <b>N-source</b>                        | <b>0.01102</b>                | <b>1</b>           | <b>0.01102</b> | <b>62.40</b>  | <b>2.72×10<sup>-10</sup></b> |
| <b>N:C ratio</b>                       | <b>0.00227</b>                | <b>1</b>           | <b>0.00227</b> | <b>12.89</b>  | <b>7.63×10<sup>-4</sup></b>  |
| <b>Inoculum</b>                        | <b>0.00113</b>                | <b>1</b>           | <b>0.00113</b> | <b>6.39</b>   | <b>1.48×10<sup>-2</sup></b>  |
| C-source • N-source                    | 0.00000                       | 1                  | 0.00000        | 0.02          | 8.81×10 <sup>-1</sup>        |
| <b>C-source • N:C ratio</b>            | <b>0.00124</b>                | <b>1</b>           | <b>0.00124</b> | <b>7.03</b>   | <b>1.08×10<sup>-2</sup></b>  |
| <b>C-source • Inoculum</b>             | <b>0.00266</b>                | <b>1</b>           | <b>0.00266</b> | <b>15.03</b>  | <b>3.16×10<sup>-4</sup></b>  |
| N-source • N:C ratio                   | 0.00002                       | 1                  | 0.00002        | 0.10          | 7.51×10 <sup>-1</sup>        |
| N-source • Inoculum                    | 0.00027                       | 1                  | 0.00027        | 1.53          | 2.22×10 <sup>-1</sup>        |
| N:C ratio • Inoculum                   | 0.00042                       | 1                  | 0.00042        | 2.38          | 1.29×10 <sup>-1</sup>        |
| C-source • N-source • N:C ratio        | 0.00015                       | 1                  | 0.00015        | 0.83          | 3.66×10 <sup>-1</sup>        |
| C-source • N-source • Inoculum         | 0.00000                       | 1                  | 0.00000        | 0.01          | 9.18×10 <sup>-1</sup>        |
| <b>C-source • N:C ratio • Inoculum</b> | <b>0.00078</b>                | <b>1</b>           | <b>0.00078</b> | <b>4.42</b>   | <b>4.07×10<sup>-2</sup></b>  |
| N-source • N:C ratio • Inoculum        | 0.00000                       | 1                  | 0.00000        | 0.00          | 9.64×10 <sup>-1</sup>        |
| Error                                  | 0.00866                       | 49                 | 0.00018        |               |                              |
| Total                                  | 0.06412                       | 63                 |                |               |                              |

<sup>(1)</sup> Constrained (Type III) sums of squares.

Based on the results obtained in Table S2, the resulting model for biomass produced per mole of carbon substrate ( $\hat{y}^*$ ), as measured by OD<sub>540</sub> per mol of carbon substrate, as a function of the parameters investigated is:

$$\hat{y}^* = \alpha_1^*x_1 + \alpha_2^*x_2 + \alpha_3^*x_3 + \alpha_4^*x_4 + \alpha_{13}^*x_1x_3 + \alpha_{14}^*x_1x_4 + \alpha_{134}^*x_1x_3x_4 \quad (\text{S2})$$

In the equation,  $x_i$  represents the factors investigated (1: C-source, 2: N-source, 3: N:C ratio, 4: inoculum history),  $\alpha_i^*$  represents the corresponding coefficients, and  $\alpha_{ij}^*$  and  $\alpha_{ijk}^*$  represent the coefficients for interactions.

## Response Surface Methodology (RSM) – Experimental Space and Parameter Coding

The design space forms a cubic three-dimensional region where the axes correspond to the carbon source ( $x_1$ ), ranging from pure methane to pure methanol, with mixtures between them; the nitrogen source ( $x_2$ ), ranging from pure ammonium to pure nitrate, with mixtures of both along the axis, and the nitrogen-to-carbon ratio ( $x_3$ ), ranging from 0.005 to 0.045. The experimental space is depicted in Fig. S4.

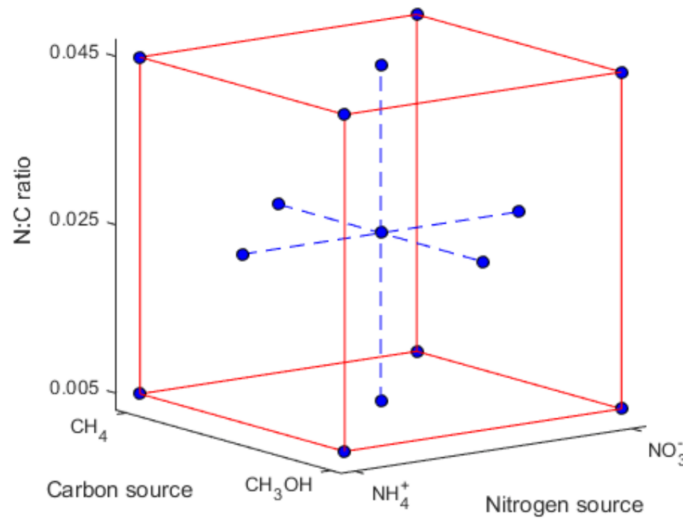

**Fig. S4:** Experimental space points for the face-centered central composite design. Three levels of each variable were used in the experiment. Carbon source: pure methane, pure methanol and an equimolar mixture. Nitrogen source: pure ammonium, pure nitrate and an equimolar mixture. Nitrogen-to-carbon ratio: 0.005, 0.025, and 0.045. Four replicates were run at the center point.

To represent the carbon source, variable  $x_1$  was used, coded as follows: let  $c_1$  and  $c_2$  be the molar fraction of methane and methanol in the carbon source. The coded variable for carbon source was:

$$x_1 = c_2 - c_1 \quad (\text{S3})$$

To represent the nitrogen source, variable  $x_2$  was used, coded as follows: let  $n_1$  and  $n_2$  be the molar fraction of ammonium and nitrate in the nitrogen source. The coded variable for nitrogen source was:

$$x_2 = n_2 - n_1 \quad (\text{S4})$$

To represent the nitrogen-to-carbon ratio, variable  $x_3$  was used, coded as follows: let  $r_1$  and  $r_2$  be the lower and upper limits of the nitrogen-to-carbon ratio for the experiment. If  $r$  is the nitrogen-to- carbon ratio, the coded variable for nitrogen-to-carbon ratio was:

$$x_3 = \frac{r - \frac{r_1 + r_2}{2}}{\frac{r_2 - r_1}{2}} \quad (S5)$$

As per the face-centered central composite design, coded values of -1, 0 and 1 were used for all the independent variables.

This design allows the fitting of a second order polynomial of the form:

$$\hat{y} = b_o + b_1x_1 + b_2x_2 + b_3x_3 + b_{11}x_1^2 + b_{22}x_2^2 + b_{33}x_3^2 + b_{12}x_1x_2 + b_{13}x_1x_3 + b_{23}x_2x_3 \quad (S6)$$



## Response Surfaces for Cell Dry Weight and PHB Concentration

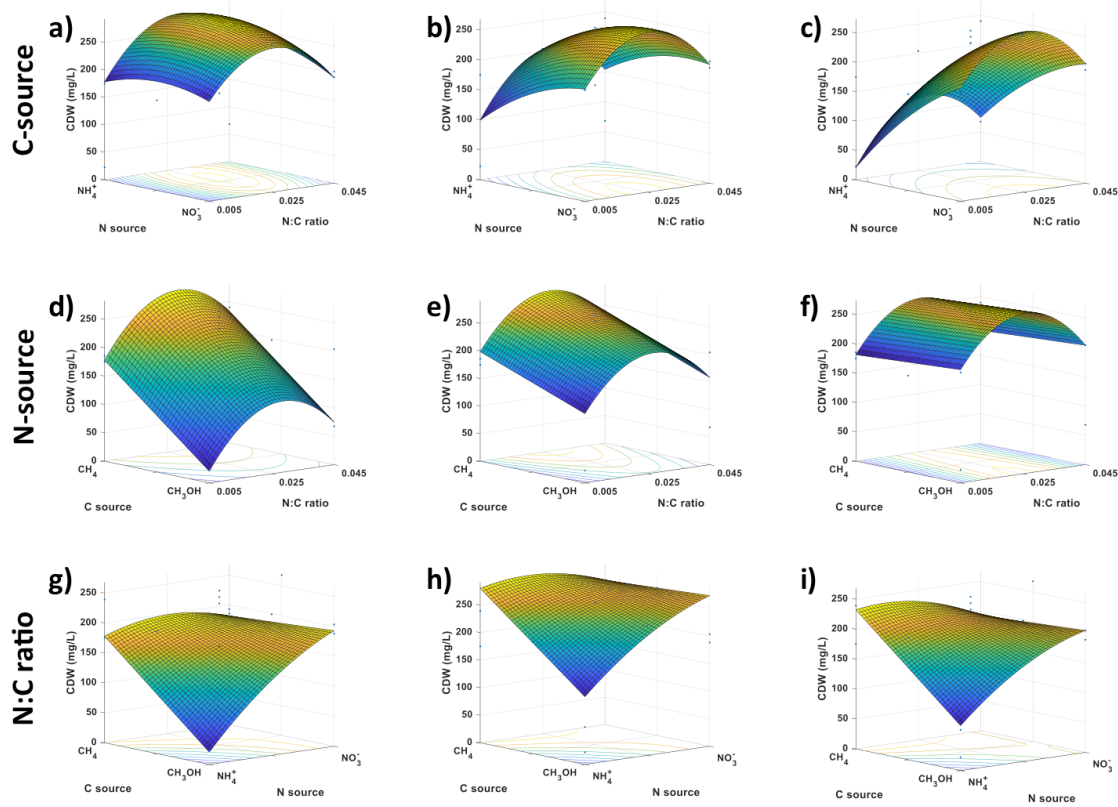

**Fig. S5.** Cell dry weight response surfaces for *M. trichosporium* OB3b growing on combinations of C-source, N-source and N:C ratio. First row: keeping C-sources constant: a) methane, b) equimolar mixture of methane and methanol, c) methanol; second row: keeping N-sources constant: d) ammonium, e) equimolar mixture of ammonium and nitrate, f) nitrate; third row: keeping N:C ratios constant: g) 0.005, h) 0.025, i) 0.045. The first row is shown in main body of manuscript as Fig. 5 and is reproduced here for convenience.

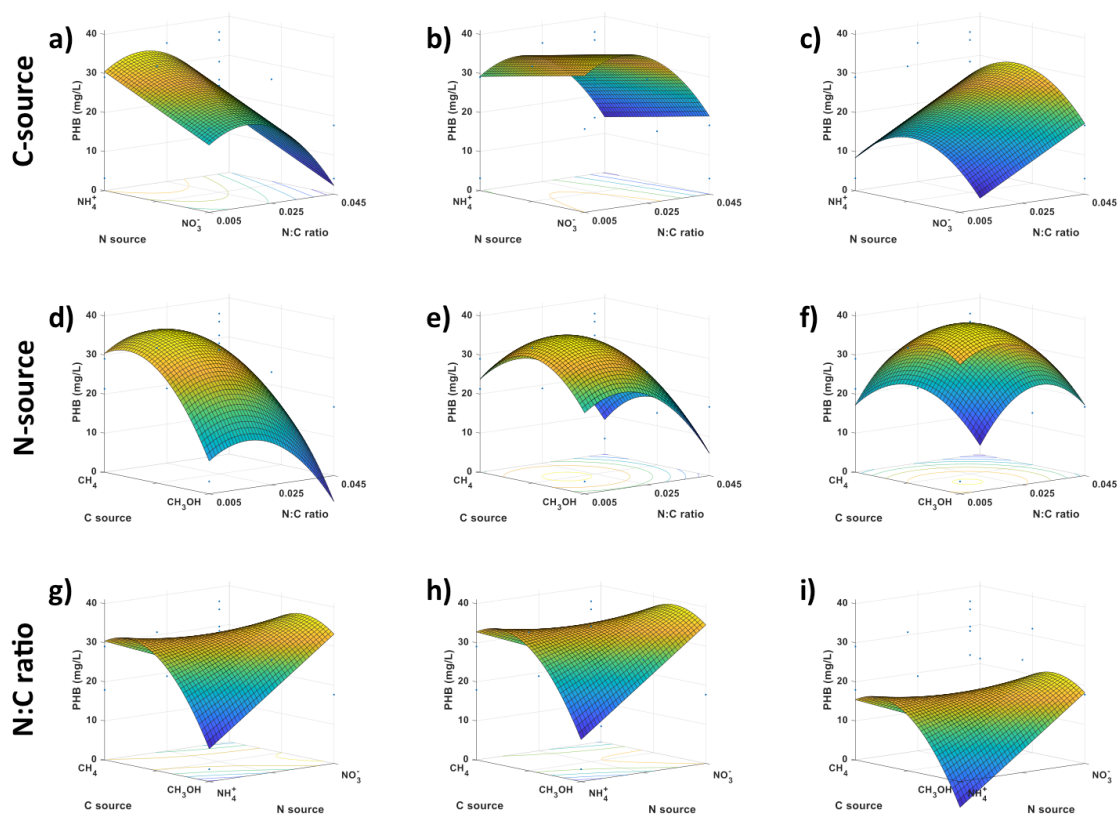

**Fig. S6.** PHB concentration response surfaces for *M. trichosporium* OB3b growing on combinations of C-source, N-source and N:C ratio. First row: keeping C-sources constant; second row: keeping N-sources constant; third row: keeping N:C ratios constant. The first row and Fig. 7f are shown in main body of manuscript as Fig. 6 and are reproduced here for convenience.

## Example of Gas Chromatography Analysis for PHB analysis

PHB was hydrolyzed to its monomer (3-hydroxybutyric acid) and esterified with methanol according to the method described in the Materials and Methods section. Methyl 3-hydroxybutyrate was identified and compared to a standard peak of methyl benzoate (obtained from the reaction of benzoic acid with methanol in the treated samples) for quantification.

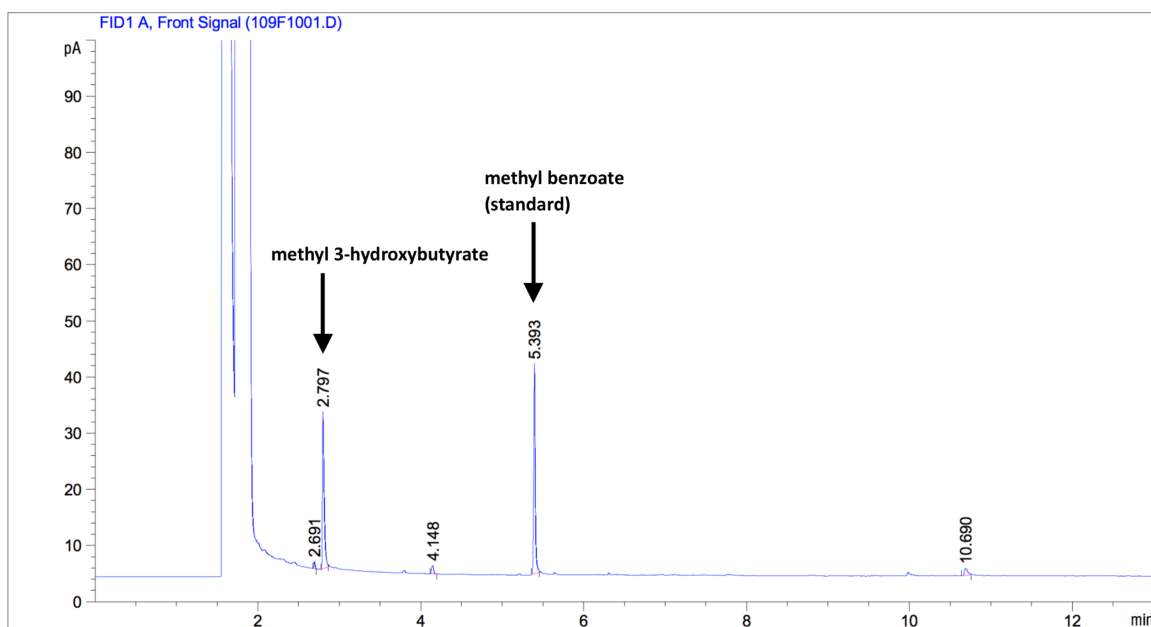

**Fig. S7.** Example of chromatogram for the quantification of methyl 3-hydroxybutyrate.
